# Supplementary material for: Neuronal and behavioral affective perceptions of human and naturalness-reduced emotional prosodies
Source: Frontiers journal article supplement (doi:10.3389/fncom.2022.1022787), 2022-11-18
Supplement: Data_Sheet_1.PDF [file Data_Sheet_1.PDF]

# 1 Acoustic Features Extracted to Define Speech Naturalness

**Supplementary Table 1.** Acoustic features extracted to define speech naturalness from whole utterances.

| Type          | Feature                                 | Description                                                                                                                                                                                                                              | Mathematical expression                                                                                                                                                                                                                                                               |
|---------------|-----------------------------------------|------------------------------------------------------------------------------------------------------------------------------------------------------------------------------------------------------------------------------------------|---------------------------------------------------------------------------------------------------------------------------------------------------------------------------------------------------------------------------------------------------------------------------------------|
| Prosodic      | Intensity (dB)                          | Mean                                                                                                                                                                                                                                     | $\mu_2 = \frac{\sum_{n=0}^{N-1} X(n)}{N}$ <p>where <math>\mu_2</math> is the mean, N is the total number of samples and X(n) is the intensity in dB at sample n.</p>                                                                                                                  |
|               |                                         | Jitter local: average absolute difference between two consecutive periods, divided by the average period.                                                                                                                                | $\left( \frac{\sum_{i=2}^P  T_i - T_{i-1} }{(P-1)} \right) / \left( \frac{\sum_{i=1}^P T_i}{P} \right) \times 100$ <p>where <math>T_i</math> is the duration of <math>i^{\text{th}}</math> period, and P is the number of periods.</p>                                                |
|               | Jitter (%)                              | Jitter ppq5: 5-point period perturbation quotient. It is the average absolute difference between a period and the average of it and its four closest neighbors, divided by the average period.                                           | $\left( \frac{\sum_{i=3}^{P-2}  T_i - (T_{i-2} + T_{i-1} + T_i + T_{i+1} + T_{i+2}) / 5 }{(P-4)} \right) / \left( \frac{\sum_{i=1}^P T_i}{P} \right) \times 100$ <p>where <math>T_i</math> is the duration of <math>i^{\text{th}}</math> period, and P is the number of periods.</p>  |
|               |                                         | Shimmer local: the average absolute difference between the amplitude of two consecutive periods, divided by the average amplitude.                                                                                                       | $\left( \frac{\sum_{i=2}^P  A_i - A_{i+1} }{(P-1)} \right) / \left( \frac{\sum_{i=1}^P A_i}{P} \right) \times 100$ <p>where <math>A_i</math> is the amplitude of <math>i^{\text{th}}</math> period, and P is the number of periods.</p>                                               |
| Voice quality |                                         | Shimmer rapq5: 5-point amplitude perturbation quotient. It is the average absolute difference between the amplitude of a period and the average of the amplitude of it and its four closest neighbors, divided by the average amplitude. | $\left( \frac{\sum_{i=3}^{P-2}  A_i - (A_{i-2} + A_{i-1} + A_i + A_{i+1} + A_{i+2}) / 5 }{(P-4)} \right) / \left( \frac{\sum_{i=1}^P A_i}{P} \right) \times 100$ <p>where <math>A_i</math> is the amplitude of <math>i^{\text{th}}</math> period, and P is the number of periods.</p> |
|               | Mean harmonics-to-noise ratio (HNR; dB) | Relation of the energy of harmonics against the energy of noise-like frequencies.                                                                                                                                                        | <p>If 99% of the signal is composed of harmonics and 1% is noise, then HNR is defined by:</p> $\text{HNR} = 10 \log_{10} (99/1) = 20 \text{ dB}$ <p>Mean harmonics-to-noise ratio between time points t1 and t2 is defined by:</p>                                                    |

---


$$\text{HNR} = \frac{1}{(t_2 - t_1)} \int_{t_1}^{t_2} dt \, x(t)$$

where  $x(t)$  is the HNR (in dB) as a function of time.

Formants  
(Hertz)

F1, F2, F3: Mean

---

Spectral

Harmonics  
intensity  
(dB)

H1\*, H2\*, H3\*, H4\*

$$H^* = H - \sum_{i=1}^n 10 \log_{10} \frac{(r^2 + 1 - 2r_i \cos(\omega_i))}{(r^2 + 1 - 2r_i \cos(\omega_i + \omega))(r^2 + 1 - 2r_i \cos(\omega_i - \omega))}$$

where  $H$  is the amplitude of the harmonic without correction (dB),  $r_i = e^{-\pi B_i / F_s}$ ,  $\omega_i = 2\pi F_i / F_s$ , and  $\omega = 2\pi f / F_s$ ,  $B$  is the bandwidth of the formant to be corrected for (Hz),  $F_s$  is the sampling frequency (Hz),  $F$  is the frequency of the formant to be corrected for (Hz), and  $f$  is the frequency of the harmonic to be corrected (Hz).

---

## 2 Naturalness-Reduced Voices: Acoustic Insight from Emotional Utterances

### 2.1 Anger

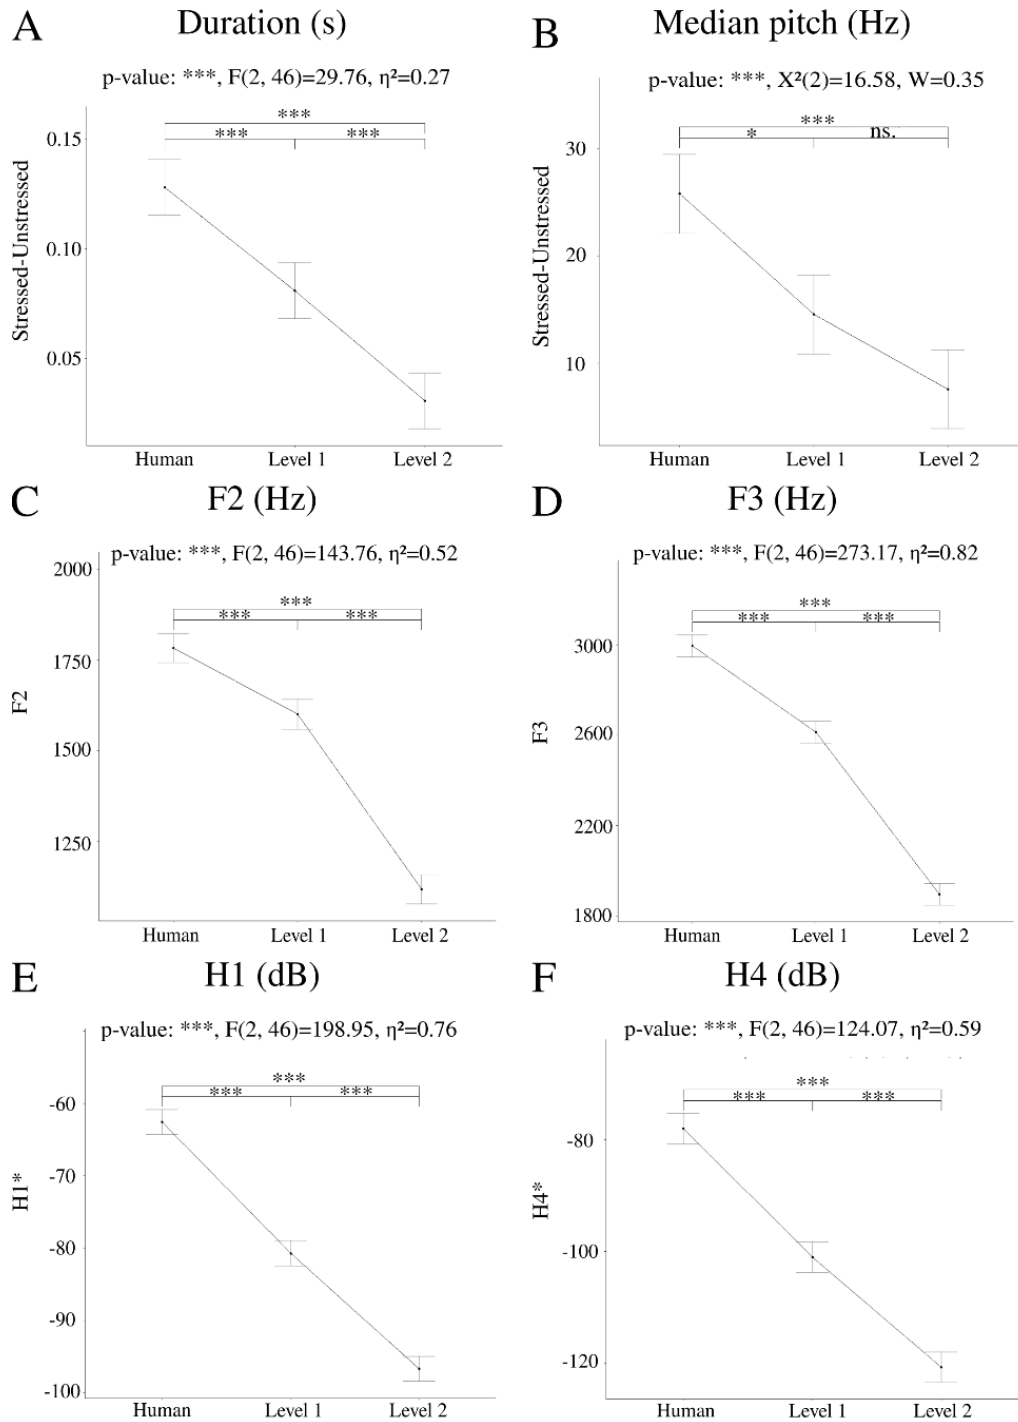

**Supplementary Figure 1.** Acoustic tendencies from human to level 2 of anger utterances as regards lexical stress: (A) duration, (B) median pitch. Graphs (C) to (F) detail trends on whole utterances. “ \* ”  $p<0.05$ , “ \*\* ”  $p<0.01$ , and “ \*\*\* ”  $p<0.001$ , ns.: non-significant.  $\eta^2$  is the generalized eta-squared for ANOVA,  $\chi^2$  is the test statistic when Friedman was applied, and W is Kendall’s effect size.

## 2.2 Disgust

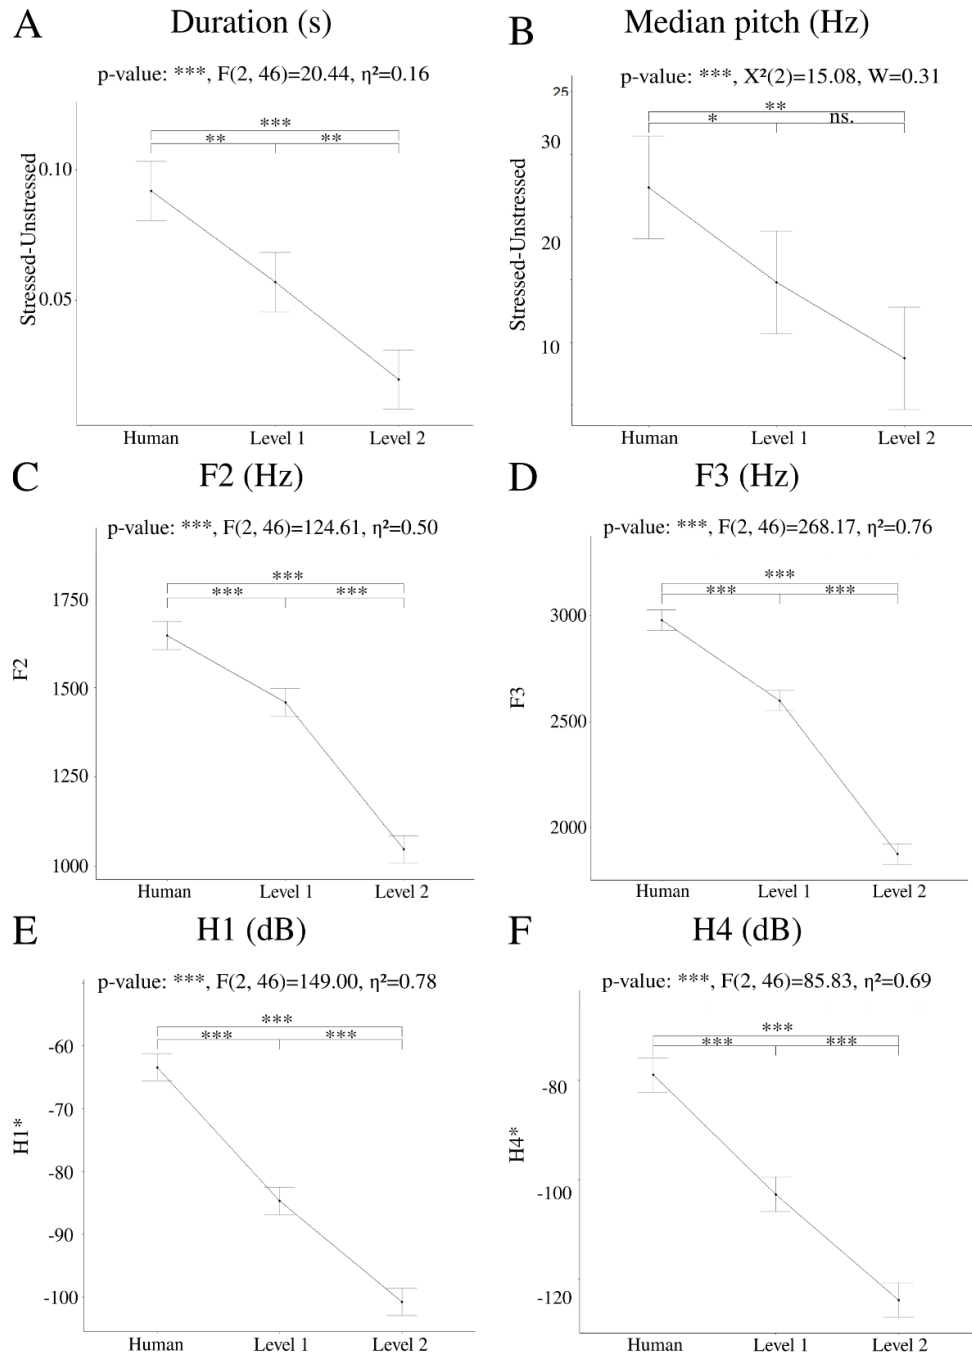

**Supplementary Figure 2.** Naturalness reduction on disgust emotional prosodies as regards lexical stress: (A) duration, (B) median pitch. Graphs (C) to (F) detail trends on whole utterances. “\*”  $p<0.05$ , “\*\*”  $p<0.01$ , and “\*\*\*”  $p<0.001$ , ns.: non-significant.  $\eta^2$  is the generalized eta-squared for ANOVA,  $\chi^2$  is the test statistic when Friedman was applied, and  $W$  is Kendall’s effect size.

## 2.3 Fear

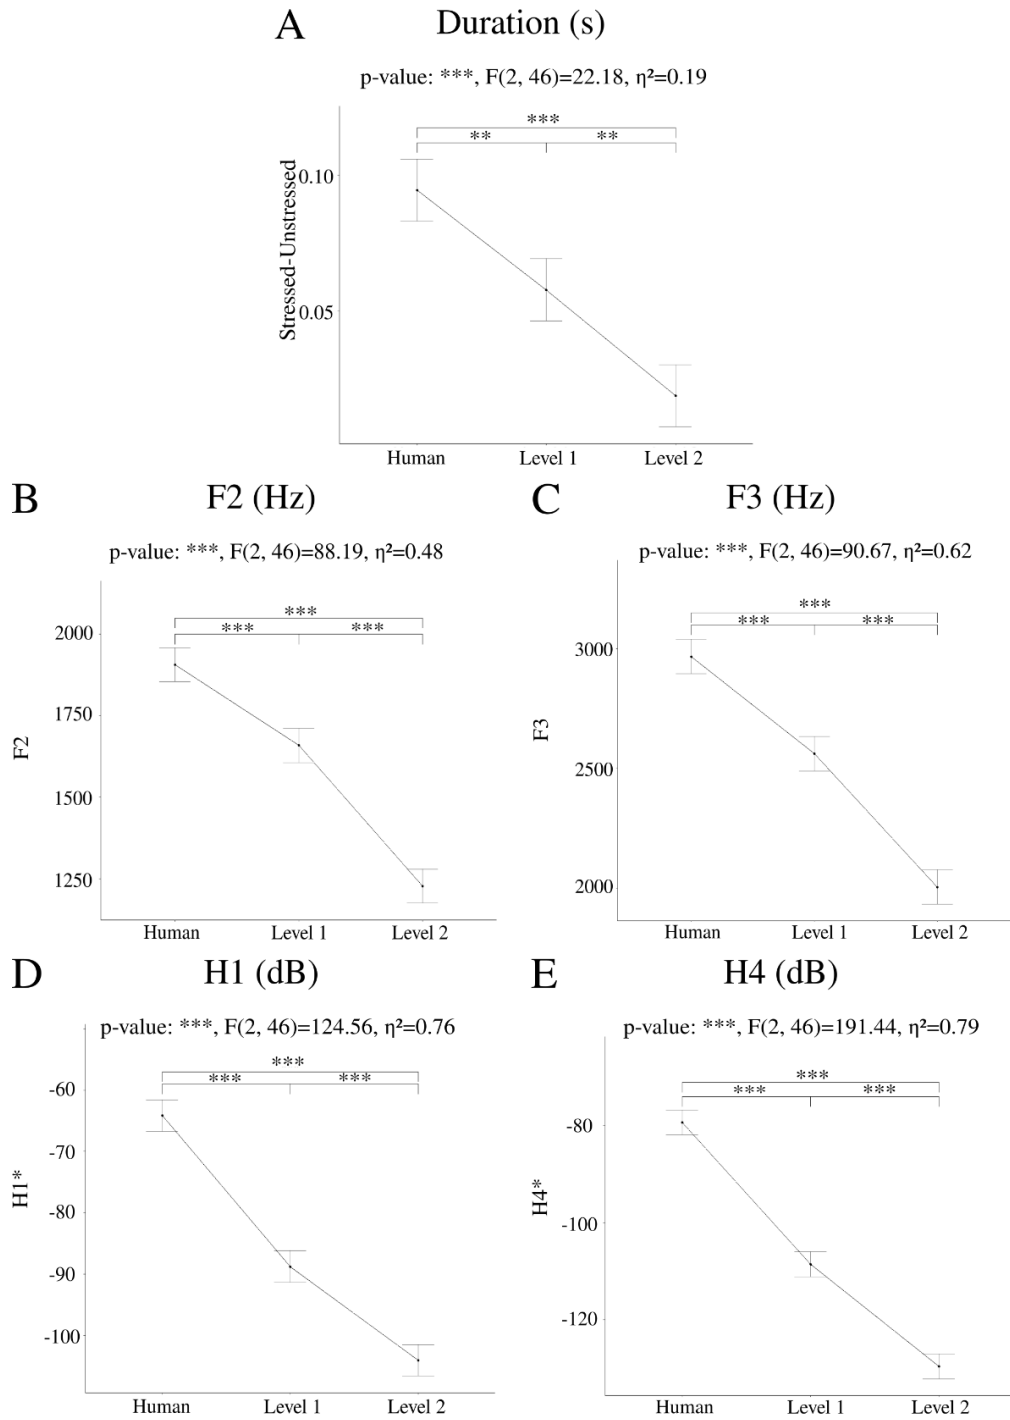

**Supplementary Figure 3.** Naturalness reduction on fear emotional prosodies as regards lexical stress: (A) duration. Graphs (B) to (E) detail trends on whole utterances. “\*”  $p<0.05$ , “\*\*”  $p<0.01$ , and “\*\*\*”  $p<0.001$ , ns.: non-significant.  $\eta^2$  is the generalized eta-squared for ANOVA,  $\chi^2$  is the test statistic when Friedman was applied, and W is Kendall’s effect size.

## 2.4 Happiness

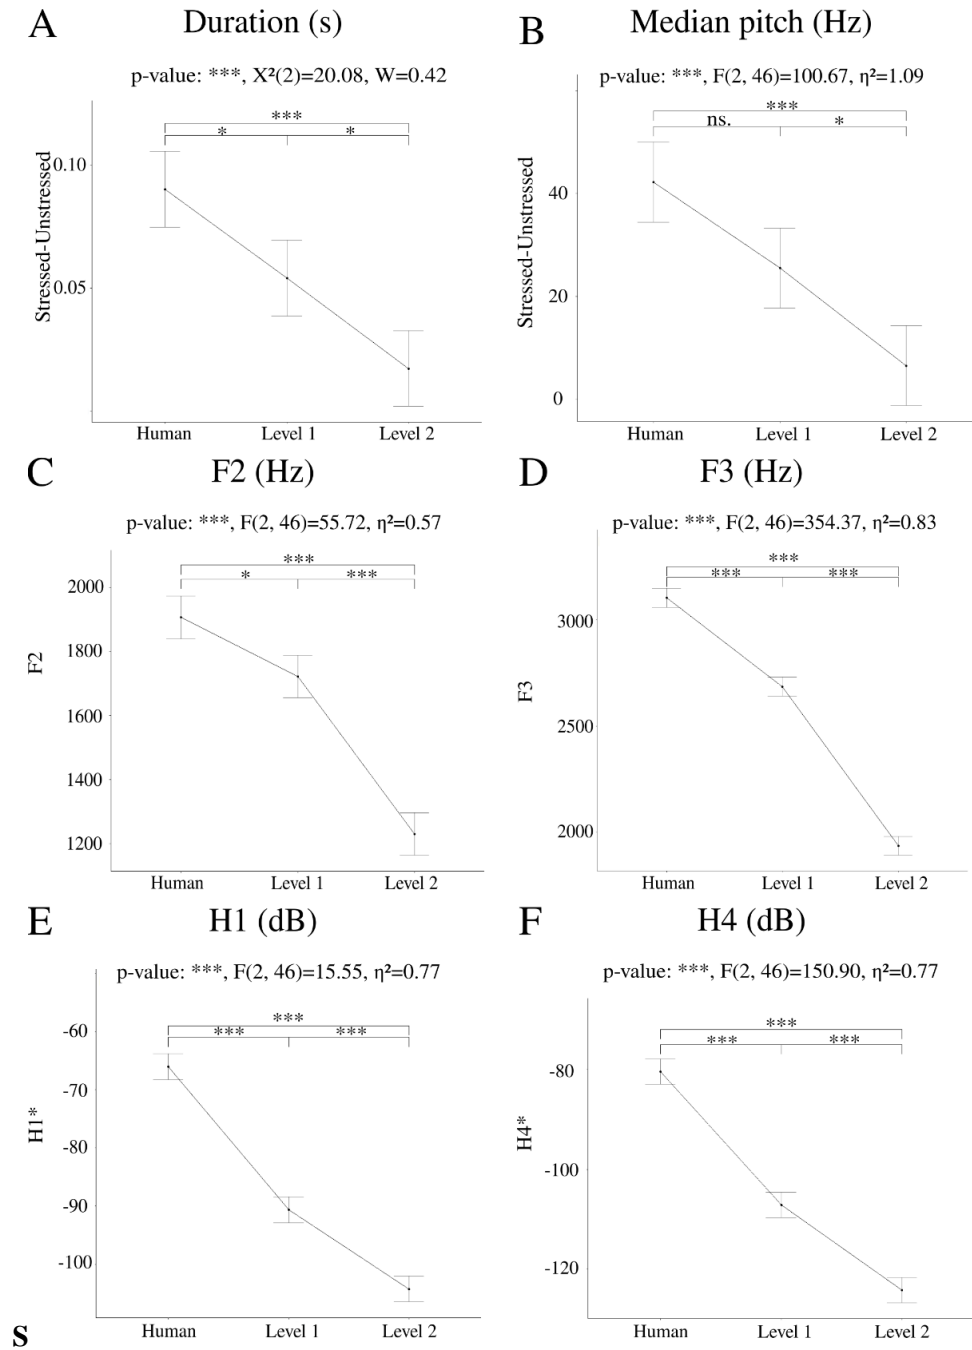

**Supplementary Figure 4.** Naturalness reduction on happiness emotional prosodies as regards lexical stress: (A) duration, (B) median pitch. Graphs (C) to (F) detail trends on whole utterances. “\*”  $p<0.05$ , “\*\*”  $p<0.01$ , and “\*\*\*”  $p<0.001$ , ns.: non-significant.  $\eta^2$  is the generalized eta-squared for ANOVA,  $\chi^2$  is the test statistic when Friedman was applied, and  $W$  is Kendall’s effect size.

## 2.5 Neutral

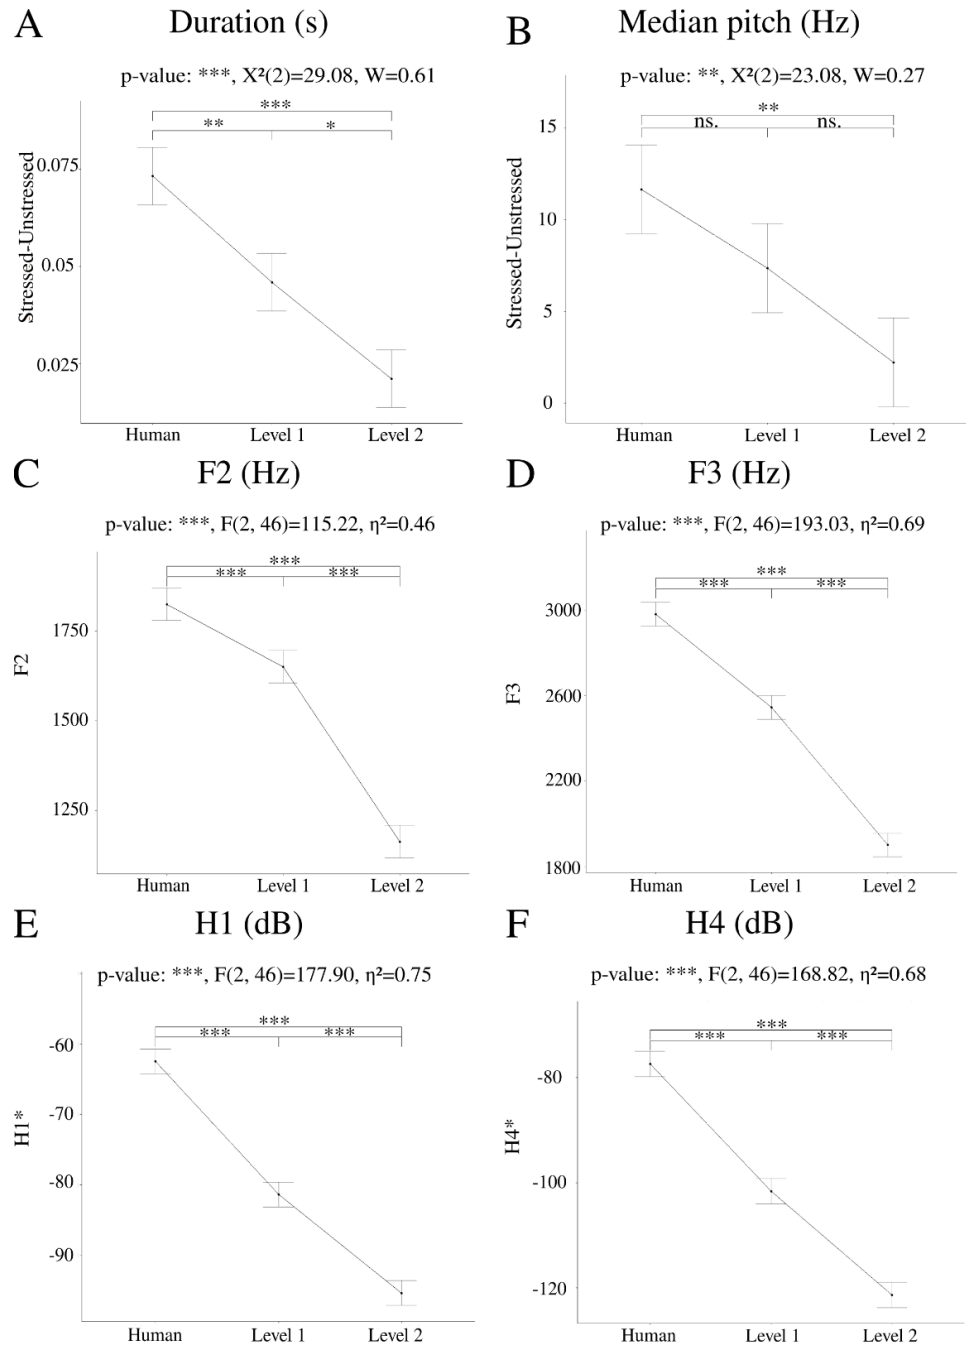

**Supplementary Figure 5.** Naturalness reduction on neutral emotional prosodies as regards lexical stress: (A) duration, (B) median pitch. Graphs (C) to (F) detail trends on whole utterances. “\*”  $p<0.05$ , “\*\*”  $p<0.01$ , and “\*\*\*”  $p<0.001$ , ns.: non-significant.  $\eta^2$  is the generalized eta-squared for ANOVA,  $\chi^2$  is the test statistic when Friedman was applied, and  $W$  is Kendall’s effect size.

## 2.6 Sadness

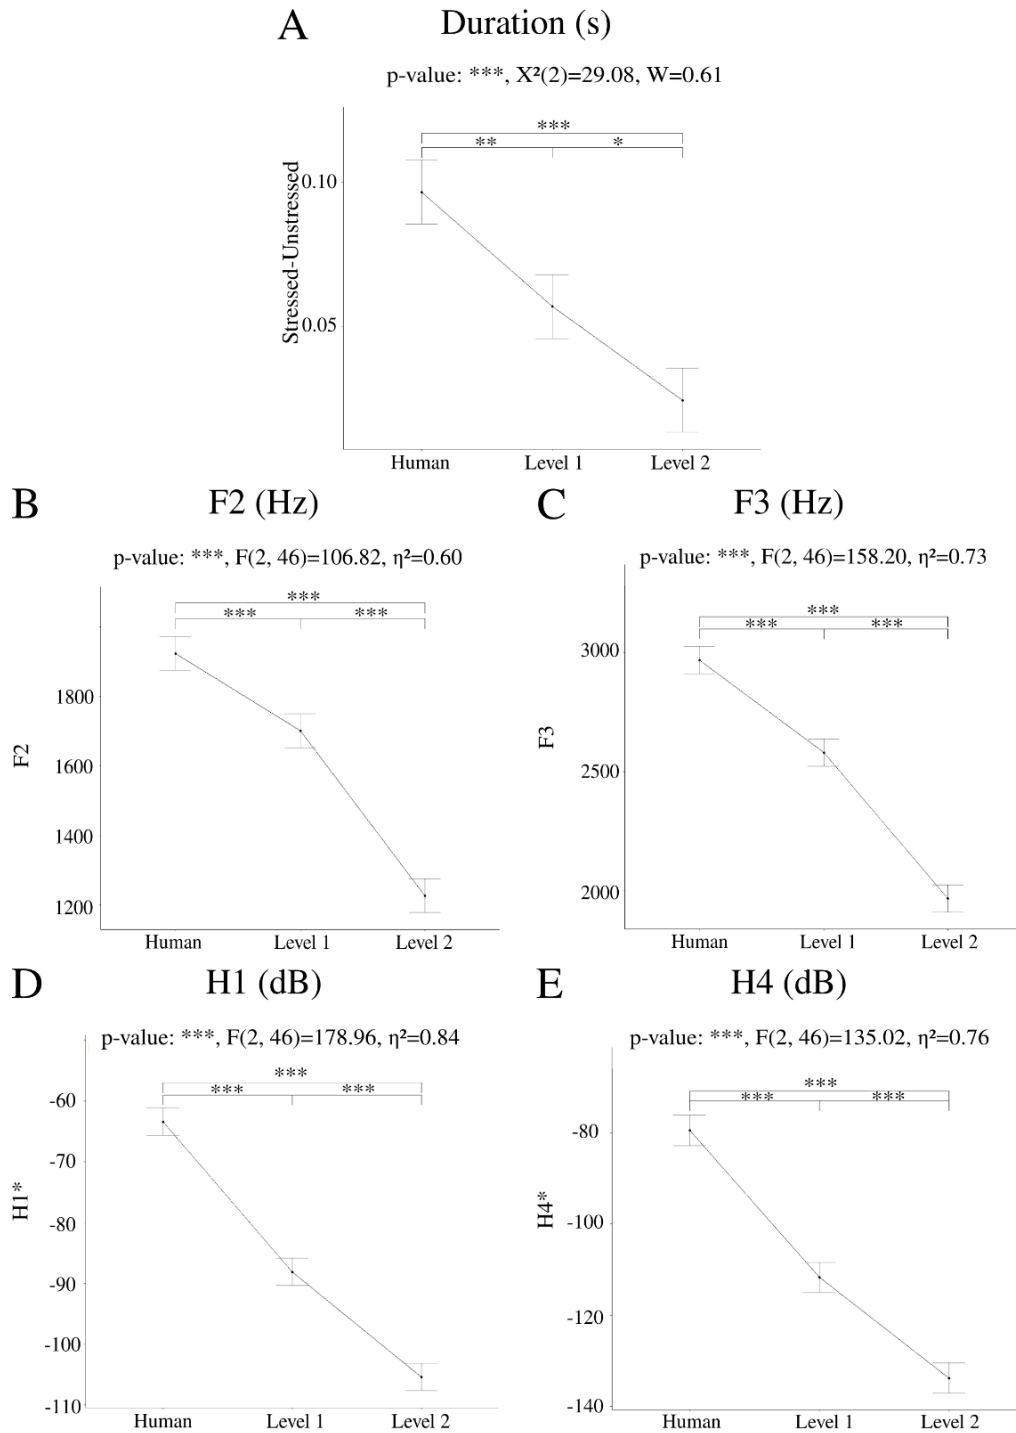

**Supplementary Figure 6.** Naturalness reduction on sadness emotional prosodies as regards lexical stress: (A) duration. Graphs (B) to (E) detail trends on whole utterances. “\*”  $p<0.05$ , “\*\*”  $p<0.01$ , and “\*\*\*”  $p<0.001$ , ns.: non-significant.  $\eta^2$  is the generalized eta-squared for ANOVA,  $\chi^2$  is the test statistic when Friedman was applied, and  $W$  is Kendall’s effect size.

### 3 ERP: Standard Deviation



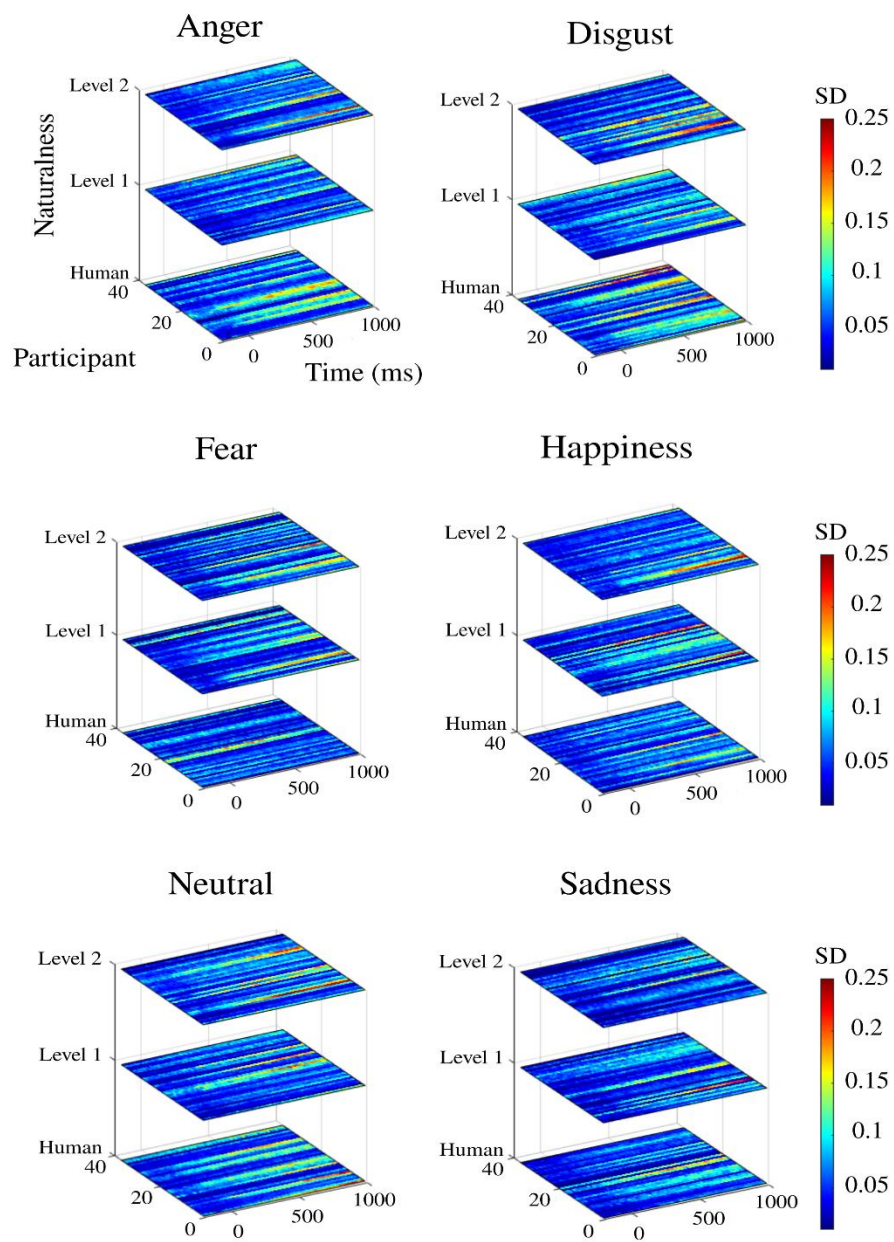

**Supplementary Figure 7.** Standard deviation of ERPs across participants.

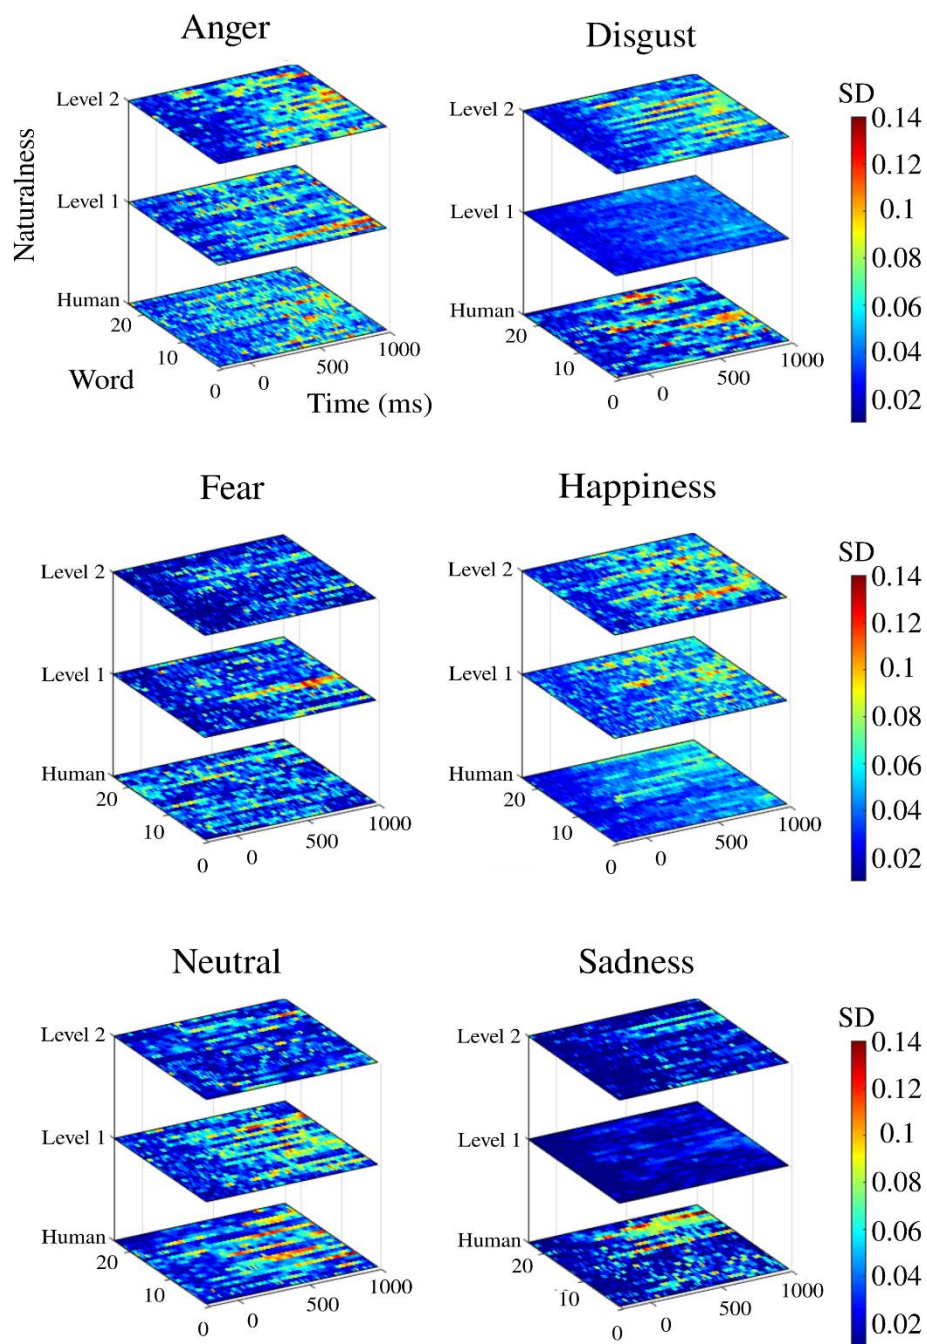

**Supplementary Figure 8.** Standard deviation of ERPs across words.
