# Supplementary material for: Neuronal and behavioral affective perceptions of human and naturalness-reduced emotional prosodies
Source: Front Comput Neurosci. 2022 Nov 18;16:1022787. doi: 10.3389/fncom.2022.1022787 (PMC9716567; doi:10.3389/fncom.2022.1022787)
Supplement: Supplementary file 2 [file Table_1.XLSX]

## Sheet: Human voice
Participant	sum(F)	p-value	Cluster sign	Cluster topography	ERP
11	3133.0379	0.000999	positive	F3 Fz F4 FC5 FC1 FC2 FC6 T7 C3 Cz C4 T8 CP5 CP1 CP2 CP6 P3 Pz P4	P200
11	3560.9449	0.000999	positive	F3 Fz F4 FC5 FC1 FC2 FC6 T7 C3 Cz C4 T8 CP5 CP1 CP2 CP6 P3 Pz P4	Early LPP
11	110.43671	0.02997	positive	FC5 T7 C3 CP5	Early LPP
11	91.429114	0.037962	positive	FC6 C4 T8 CP2 CP6 P4	Early LPP
11	226.37539	0.008991	positive	F3 Fz FC5 FC1 FC2 FC6 T7 C3 Cz C4 T8 CP5 CP2 CP6 P4	Late LPP
11	179.82517	0.013986	positive	F3 FC5 FC1 FC6 T7 C3 Cz C4 T8 CP5 CP2 CP6 P4	Late LPP
11	107.97312	0.030969	positive	F3 FC5 FC1 T7 C3 CP5	Late LPP
13	1291.4555	0.036963	positive	F3 Fz F4 FC5 FC1 FC2 FC6 T7 C3 Cz C4 T8 CP5 CP1 CP2 CP6 P3 Pz P4	Early LPP
14	3988.7575	0.000999	positive	F3 Fz F4 FC5 FC1 FC2 FC6 T7 C3 Cz C4 T8 CP5 CP1 CP2 CP6 P3 P4	P200
14	4817.9344	0.000999	positive	F3 Fz F4 FC5 FC1 FC2 FC6 T7 C3 Cz C4 T8 CP5 CP1 CP2 CP6 P3 P4	Early LPP
14	1800.415	0.000999	positive	F3 Fz F4 FC5 FC1 FC2 FC6 T7 C3 Cz C4 T8 CP5 CP1 CP2 CP6 P3 P4	Early LPP
14	984.59561	0.000999	positive	F3 Fz FC5 FC1 FC2 T7 C3 Cz CP5 CP1 P3	Early LPP
14	498.46254	0.001998	positive	F3 Fz F4 FC5 FC1 FC2 FC6 C3 Cz C4 T8 CP1 CP6	Late LPP
15	382.9703	0.00999	positive	F3 Fz FC5 FC1 FC2 T7 C3 Cz C4 CP5 CP1 CP2 P3	P200
15	659.7675	0.002997	positive	F3 FC5 FC1 T7 C3 Cz CP5 CP1 CP2 P3 Pz	Late LPP
15	303.9974	0.017982	positive	F3 FC5 FC1 T7 C3 Cz CP5 CP1 P3	Late LPP
18	1192.8338	0.038961	positive	F3 Fz F4 FC5 FC1 FC2 FC6 T7 C3 Cz C4 T8 CP5 CP1 CP2 CP6 P3 Pz P4	Early LPP
18	3917.6008	0.004995	positive	F3 Fz F4 FC5 FC1 FC2 FC6 T7 C3 Cz C4 T8 CP5 CP1 CP2 CP6 P3 Pz P4	Late LPP
19	477.8135	0.000999	positive	Fz FC5 FC1 FC2 T7 C3 Cz C4 CP5 CP1 CP2 CP6 P3 Pz P4	P200
19	194.498	0.001998	positive	F3 Fz F4 FC5 FC1 FC2 FC6 T7 C3 C4 T8 CP5 CP1 CP2 CP6 P3 Pz P4	Early LPP
19	77.90166	0.013986	positive	Fz F4 FC1 FC2 FC6 Cz C4	Late LPP
20	360.1901	0.002997	positive	F3 Fz F4 FC5 FC1 FC2 FC6 T7 C3 Cz C4 CP5 CP1 CP2 CP6 P3 Pz P4	Early LPP
21	537.4597	0.000999	positive	Fz FC5 FC1 FC2 FC6 T7 C3 Cz C4 T8 CP5 CP1 CP2 CP6 Pz	P200
21	271.0198	0.001998	positive	F3 Fz F4 FC5 FC1 FC2 FC6 T7 C3 C4 CP5	Early LPP
21	333.3372	0.001998	positive	F3 Fz F4 FC5 FC1 FC2 FC6 T7 C3 Cz C4 CP5 CP2	Late LPP
21	226.1017	0.005994	positive	F3 Fz F4 FC5 FC1 FC2 FC6 C3 Cz T8 CP5 CP1 CP2 CP6 P3 P4	Late LPP
21	151.1919	0.020979	positive	F3 Fz FC5 FC1 FC2 C3 Cz	Late LPP
22	753.55759	0.003996	positive	Fz F4 FC1 FC2 FC6 C3 Cz C4 T8 CP1 CP2 CP6 Pz P4	P200
22	3282.9294	0.000999	positive	F3 Fz F4 FC5 FC1 FC2 FC6 T7 C3 Cz C4 T8 CP5 CP1 CP2 CP6 P3 Pz P4	Early LPP
22	2884.5674	0.000999	positive	F3 Fz F4 FC5 FC1 FC2 FC6 T7 C3 Cz C4 T8 CP5 CP1 CP2 CP6 P3 Pz P4	Early LPP
22	2304.0982	0.000999	positive	F3 Fz F4 FC5 FC1 FC2 FC6 T7 C3 Cz C4 T8 CP5 CP1 CP2 CP6 P3 Pz P4	Late LPP
22	840.34401	0.002997	positive	Fz F4 FC1 FC2 FC6 C3 Cz C4 T8 CP1 CP2 CP6 Pz P4	Late LPP
23	81.4435	0.012987	positive	F3 FC5 FC1 C3	P200
27	83.3854	0.006993	positive	F4 FC2 FC6 C4	Early LPP
3	1535.6259	0.000999	positive	F3 Fz F4 FC5 FC1 FC2 FC6 T7 C3 Cz C4 CP5 CP1 CP2 CP6 P3 Pz P4	Early LPP
3	401.85933	0.000999	positive	Fz F4 FC1 FC2 FC6 C3 Cz C4 CP5 CP1 CP2 CP6 P3 Pz P4	Early LPP
3	146.52445	0.014985	positive	F4 FC2 FC6 C4 CP2 CP6 P4	Early LPP
3	107.97145	0.020979	positive	FC1 C3 Cz C4 CP1 CP2 CP6 Pz P4	Early LPP
3	322.98513	0.000999	positive	F3 Fz F4 FC5 FC1 FC2 FC6 T7 C3 Cz C4 CP5 CP1 CP2 CP6 P3 Pz P4	Late LPP
3	139.48732	0.015984	positive	F4 FC2 FC6 C4 CP2 CP6 P4	Late LPP
3	100.74083	0.022977	positive	Cz C4 CP1 CP2 CP6 Pz P4	Late LPP
30	1378.5017	0.000999	positive	F3 Fz F4 FC5 FC1 FC2 FC6 T7 C3 Cz C4 T8 CP5 CP1 CP2 CP6 P3 Pz P4	P200
30	474.01139	0.000999	positive	F3 Fz F4 FC5 FC1 FC2 FC6 T7 C3 Cz C4 T8 CP5 CP1 CP2 CP6 P3 Pz P4	P200
30	1370.8758	0.000999	positive	F3 Fz F4 FC5 FC1 FC2 FC6 T7 C3 Cz C4 T8 CP5 CP1 CP2 CP6 P3 Pz P4	Early LPP
30	494.9142	0.000999	positive	F3 Fz FC5 FC1 FC2 T7 C3 Cz C4 CP5 CP1 CP2 CP6 P3 P4	Early LPP
30	2206.2629	0.000999	positive	F3 Fz FC5 FC1 FC2 T7 C3 C4 CP5 CP1 CP2 CP6 P3 Pz P4	Late LPP
30	1370.8758	0.000999	positive	F3 Fz F4 FC5 FC1 FC2 FC6 T7 C3 Cz C4 T8 CP5 CP1 CP2 CP6 P3 Pz P4	Late LPP
30	798.37558	0.000999	positive	F3 Fz F4 FC5 FC1 FC2 FC6 T7 C3 C4 T8 CP5 CP1 CP2 CP6 P3 Pz P4	Late LPP
30	182.82147	0.005994	positive	C4 CP2 CP6 P4	Late LPP
31	326.8246	0.000999	positive	F3 F4 FC5 FC1 FC2 FC6 T7 C3 Cz C4 T8 CP5 CP1 CP2 CP6 P3 Pz P4	Early LPP
31	315.2136	0.000999	positive	F3 Fz F4 FC5 FC1 FC2 FC6 C3 Cz C4 T8 CP1 CP2 CP6 Pz P4	Early LPP
31	163.3121	0.000999	positive	Fz F4 FC1 FC2 FC6 Cz C4 T8 CP2 CP6 P4	Early LPP
31	124.5544	0.002997	positive	F4 FC2 FC6 Cz C4 T8 CP2 CP6 P4	Late LPP
31	66.32958	0.041958	positive	Fz F4 FC1 FC2 FC6 Cz C4 CP2	Late LPP
33	313.0421	0.000999	positive	F3 Fz F4 FC5 FC1 FC2 FC6 C3 Cz C4 T8 CP1 CP2 CP6 Pz P4	Late LPP
35	1510.4608	0.028971	positive	F3 Fz F4 FC5 FC1 FC2 FC6 T7 C3 Cz C4 T8 CP5 CP1 CP2 CP6 P3 Pz P4	P200
36	104.6613	0.022977	positive	FC6 C4 T8 CP2 CP6 P4	P200
36	87.23384	0.03996	positive	C4 CP2 CP6 P4	P200
36	88.35041	0.03996	positive	F3 Fz FC5 FC1 FC2 T7 C3 Cz CP5 CP1	Early LPP
5	88.78344	0.045954	positive	C4 CP2 CP6 P4	Early LPP
6	2932.6625	0.003996	positive	F3 Fz FC5 FC1 FC2 C3 Cz CP1 CP2 Pz	Early LPP
7	10032.0093	0.000999	positive	F3 Fz F4 FC5 FC1 FC2 FC6 T7 C3 Cz C4 T8 CP5 CP1 CP2 CP6 P3 Pz P4	Late LPP
8	194.2007	0.006993	positive	FC2 Cz C4 CP1 CP2 Pz	P200
8	183.594	0.007992	positive	Fz FC1 FC2 C3 Cz C4 CP1 CP2	P200

## Sheet: Level 1
Participant	sum(F)	p-value	Cluster sign	Cluster topography	ERP
11	378.1593	0.000999	positive	F3 Fz F4 FC5 FC1 FC2 FC6 T7 C3 Cz C4 T8 CP5 CP2 CP6 P4	Late LPP
14	337.19924	0.001998	positive	F3 Fz FC5 FC1 FC2 T7 C3 Cz CP5	P200
14	302.08364	0.001998	positive	F3 Fz F4 FC5 FC1 FC2 FC6 T7 C3 Cz C4 T8 CP5 CP1 CP2 CP6 P3 Pz P4	P200
14	1498.4377	0.000999	positive	F3 Fz F4 FC5 FC1 FC2 FC6 T7 C3 C4 T8 CP5 CP1 CP2 CP6 P3 Pz P4	Early LPP
14	1312.0879	0.000999	positive	F3 Fz F4 FC5 FC1 FC2 FC6 T7 C3 Cz C4 T8 CP5 CP1 CP2 CP6 P3 Pz P4	Early LPP
14	821.62057	0.000999	positive	F3 Fz F4 FC5 FC1 FC2 FC6 T7 C3 Cz C4 T8 CP5 CP1 CP2 CP6 P3 Pz P4	Early LPP
14	766.47015	0.000999	positive	F3 Fz F4 FC5 FC1 FC2 FC6 T7 C3 Cz C4 T8 CP5 CP1 CP2 CP6 P3 Pz P4	Early LPP
14	234.20648	0.004995	positive	F3 FC5 FC1 C3	Early LPP
14	766.47015	0.000999	positive	F3 Fz F4 FC5 FC1 FC2 FC6 T7 C3 Cz C4 T8 CP5 CP1 CP2 CP6 P3 Pz P4	Late LPP
14	249.80559	0.002997	positive	F3 FC5 FC1 C3	Late LPP
14	162.29965	0.01998	positive	F3 FC5 FC1 T7 C3 Cz CP5 CP1 P3	Late LPP
15	1454.2567	0.000999	positive	F3 Fz FC5 FC1 FC2 FC6 T7 C3 Cz C4 T8 CP5 CP1 CP2 CP6 P3 Pz P4	P200
15	2977.7168	0.000999	positive	F3 Fz F4 FC5 FC1 FC2 FC6 T7 C3 Cz C4 T8 CP5 CP1 CP2 CP6 P3 Pz P4	Early LPP
15	495.84567	0.001998	positive	F3 Fz F4 FC5 FC1 FC2 FC6 T7 C3 Cz C4 T8 CP5 CP1 CP2 CP6 P3 Pz P4	Early LPP
15	339.94363	0.005994	positive	F3 Fz FC5 FC1 FC2 FC6 C3 Cz C4 T8 CP1 CP2 CP6 Pz	Early LPP
15	202.95521	0.01998	positive	F3 Fz FC5 FC1 FC2 C3 Cz CP1 CP2 Pz	Early LPP
15	3974.6413	0.000999	positive	F3 Fz F4 FC5 FC1 FC2 FC6 T7 C3 Cz C4 T8 CP5 CP1 CP2 CP6 P3 Pz P4	Late LPP
15	2035.8791	0.000999	positive	F3 Fz F4 FC5 FC1 FC2 FC6 T7 C3 Cz C4 T8 CP5 CP1 CP2 CP6 P3 Pz P4	Late LPP
18	46290.1669	0.000999	positive	F3 Fz F4 FC5 FC1 FC2 FC6 T7 C3 Cz C4 T8 CP5 CP1 CP2 CP6 P3 Pz P4	Early LPP
20	108.2357	0.013986	positive	C4 CP2 CP6 P4	P200
20	182.9006	0.004995	positive	F4 FC5 FC2 FC6 T7 C3 Cz C4 CP5 CP1 CP2 P3	Late LPP
22	209.3361	0.000999	positive	FC6 C4 T8 CP2 CP6 P4	Late LPP
22	120.7737	0.003996	positive	FC6 C4 T8 CP2 CP6 P4	Late LPP
22	99.18005	0.005994	positive	C4 CP2 CP6 P4	Late LPP
23	448.19836	0.005994	positive	F3 Fz F4 FC5 FC1 FC2 FC6 T7 C3 Cz C4 T8 CP5 CP1 CP2 CP6 P3 Pz P4	P200
23	1927.6189	0.000999	positive	F3 Fz F4 FC5 FC1 FC2 FC6 T7 C3 Cz C4 T8 CP5 CP1 CP2 CP6 P3 Pz P4	Early LPP
23	455.84399	0.005994	positive	F3 Fz F4 FC5 FC1 FC2 FC6 T7 C3 C4 T8 CP5 CP2 CP6 P4	Early LPP
23	1545.3349	0.000999	positive	F3 Fz F4 FC5 FC1 FC2 FC6 T7 C3 Cz C4 T8 CP5 CP1 CP2 CP6 P3 Pz P4	Late LPP
23	455.84399	0.005994	positive	F3 Fz F4 FC5 FC1 FC2 FC6 T7 C3 C4 T8 CP5 CP2 CP6 P4	Late LPP
24	849.4044	0.001998	positive	Fz FC1 FC2 C3 Cz C4 CP1 CP2 CP6 Pz P4	P200
24	157.7835	0.046953	positive	Fz FC1 FC2 Cz C4 CP2 CP6 P4	P200
24	901.9184	0.001998	positive	Fz F4 FC1 FC2 FC6 C3 Cz C4 CP1 CP2 CP6 P4	Early LPP
24	827.0117	0.001998	positive	Fz FC1 FC2 C3 Cz C4 CP5 CP1 CP2 CP6 P3 P4	Early LPP
24	619.3503	0.001998	positive	Fz FC1 FC2 C3 Cz C4 CP1 CP2 CP6 P4	Early LPP
24	309.2144	0.007992	positive	Fz F4 FC1 FC2 FC6 Cz C4 CP2 CP6 P4	Early LPP
24	501.8133	0.002997	positive	Fz FC1 FC2 C3 Cz C4 CP1 CP2 CP6 P4	Late LPP
29	268.6366	0.003996	positive	F3 Fz FC5 FC1 FC2 C3 Cz	Late LPP
3	1256.6645	0.000999	positive	F3 Fz F4 FC5 FC1 FC2 FC6 T7 C3 Cz C4 T8 CP5 CP1 CP2 CP6 P3 Pz P4	P200
3	3643.2817	0.000999	positive	F3 Fz F4 FC5 FC1 FC2 FC6 T7 C3 Cz C4 T8 CP5 CP1 CP2 CP6 P3 Pz P4	Early LPP
3	1183.3638	0.000999	positive	F3 Fz F4 FC5 FC1 FC2 FC6 C3 Cz C4 T8 CP5 CP1 CP2 CP6 P3 Pz P4	Early LPP
3	624.45893	0.000999	positive	F3 Fz F4 FC5 FC1 FC2 FC6 C3 Cz C4 T8 CP5 CP1 CP2 CP6 P3 Pz P4	Early LPP
3	182.19599	0.004995	positive	F3 FC5 FC1 C3 CP5 CP1 P3	Early LPP
3	3643.2817	0.000999	positive	F3 Fz F4 FC5 FC1 FC2 FC6 T7 C3 Cz C4 T8 CP5 CP1 CP2 CP6 P3 Pz P4	Late LPP
3	1460.9845	0.000999	positive	F3 Fz F4 FC5 FC1 FC2 FC6 T7 C3 Cz C4 T8 CP5 CP1 CP2 CP6 P3 Pz P4	Late LPP
3	276.68691	0.002997	positive	F3 Fz F4 FC5 FC1 FC2 FC6 T7 C3 C4 T8 CP5 CP1 CP6 P3	Late LPP
30	61.94091	0.026973	positive	FC5 T7 C3 CP5	P200
30	382.9885	0.000999	positive	F3 Fz FC5 FC1 FC2 FC6 T7 C3 Cz C4 T8 CP5 CP1 CP2 CP6 P3 Pz P4	Early LPP
30	163.5002	0.001998	positive	FC5 T7 C3 CP5	Late LPP
30	105.6616	0.005994	positive	FC5 T7 C3 CP5	Late LPP
30	59.73134	0.027972	positive	FC5 T7 C3 CP5	Late LPP
30	49.74457	0.04995	positive	FC5 T7 C3 CP5	Late LPP
31	425.0939	0.000999	positive	Fz F4 FC5 FC1 FC2 FC6 T7 C3 Cz C4 CP5 CP1 CP2 CP6 Pz P4	P200
31	223.3038	0.006993	positive	C4 CP2 CP6 P4	Late LPP
31	124.059	0.040959	positive	C4 CP2 CP6 P4	Late LPP
32	548.1523	0.008991	positive	FC1 FC2 C3 Cz C4 CP1 CP2 Pz	P200
32	882.1505	0.004995	positive	FC1 FC2 C3 Cz C4 CP1 CP2 Pz	Early LPP
32	377.1912	0.021978	positive	FC1 FC2 C3 Cz C4 CP1 CP2	Early LPP
32	575.5499	0.008991	positive	FC1 FC2 C3 Cz C4 CP1 CP2 Pz	Late LPP
33	444.72411	0.002997	positive	F3 Fz F4 FC5 FC1 FC2 FC6 T7 C3 Cz C4 T8 CP5 CP1 CP2 CP6 P3 Pz P4	Early LPP
33	372.15068	0.007992	positive	F3 Fz F4 FC5 FC1 FC2 FC6 T7 C3 Cz C4 T8 CP5 CP1 CP2 CP6 P3 Pz P4	Early LPP
35	270.198	0.003996	positive	F3 Fz F4 FC5 FC1 FC2 FC6 T7 Cz C4 CP5 CP1 CP2 P3	Early LPP
35	439.8476	0.002997	positive	F3 Fz F4 FC5 FC1 FC2 FC6 T7 Cz C4 CP5 CP1 CP2 P3	Late LPP
35	339.3426	0.002997	positive	F3 Fz F4 FC5 FC1 FC2 FC6 T7 Cz C4 CP5 CP1 CP2 P3	Late LPP
35	190.4427	0.016983	positive	F3 Fz F4 FC5 FC1 FC2 FC6 T7 Cz C4 CP5 CP1 CP2 P3	Late LPP
35	124.7341	0.042957	positive	F3 Fz F4 FC5 FC1 FC2 FC6 T7 Cz C4 CP5 CP1 CP2 P3	Late LPP
35	111.4126	0.047952	positive	F4 FC2 FC6 Cz C4 CP2	Late LPP
36	342.54399	0.000999	positive	Fz F4 FC1 FC2 FC6 C3 Cz C4 T8 CP1 CP2 CP6 Pz	P200
36	55.080623	0.044955	positive	Cz CP1 CP2 Pz	P200
36	419.94975	0.000999	positive	F3 Fz FC5 FC1 FC2 C3 Cz CP1 CP2 Pz	Early LPP
36	309.856	0.000999	positive	Fz FC1 FC2 Cz CP1 CP2 Pz	Early LPP
36	294.71626	0.000999	positive	F3 Fz F4 FC5 FC1 FC2 FC6 C3 Cz C4 CP1 CP2 Pz	Early LPP
36	1002.4079	0.000999	positive	F3 Fz F4 FC5 FC1 FC2 FC6 T7 C3 Cz C4 CP5 CP1 CP2 CP6 P3 Pz P4	Late LPP
36	828.30835	0.000999	positive	F3 Fz FC5 FC1 FC2 T7 C3 Cz CP5 CP1 CP2 P3 Pz	Late LPP
36	434.33246	0.000999	positive	F3 Fz F4 FC5 FC1 FC2 FC6 T7 T8 CP5 CP1 CP2 CP6 P3 Pz P4	Late LPP
36	69.569937	0.026973	positive	Fz FC1 FC2 Cz CP1 CP2 Pz	Late LPP
36	62.246398	0.031968	positive	F3 FC5 FC1 C3	Late LPP
5	175.7606	0.026973	positive	Fz FC1 FC2 C3 Cz C4 CP1 CP2 CP6 Pz P4	P200
5	316.8544	0.006993	positive	Fz FC1 FC2 C3 Cz C4 CP5 CP1 CP2 CP6 P3 Pz P4	Late LPP

## Sheet: Level 2
Participant	sum(F)	p-value	Cluster sign	Cluster topography	ERP
11	800.6545	0.002997	positive	F3 Fz F4 FC5 FC1 FC2 FC6 T7 C3 Cz C4 T8 CP5 CP1 CP2 CP6 P3 Pz P4	P200
11	173.9069	0.033966	positive	Fz FC1 FC2 C3 Cz CP5 CP1 P3	P200
12	1184.6555	0.017982	positive	FC6 C4 T8 CP2 CP6 P4	Late LPP
13	4373.1005	0.00999	positive	F3 Fz F4 FC5 FC1 FC2 FC6 T7 C3 Cz C4 T8 CP5 CP1 CP2 CP6 P3 Pz P4	P200
14	728.4225	0.000999	positive	Fz F4 FC1 FC2 FC6 Cz C4 T8 CP1 CP2 CP6 Pz P4	P200
14	213.1897	0.010989	positive	Fz FC1 FC2 FC6 Cz C4 T8 CP1 CP2 CP6 Pz	P200
14	263.2461	0.006993	positive	F4 FC2 FC6 Cz C4 T8 CP1 CP2 CP6 Pz P4	Early LPP
15	387.6769	0.003996	positive	F3 Fz F4 FC5 FC1 FC2 FC6 T7 C3 Cz C4 T8 CP5 CP1 CP2 CP6 P3 Pz P4	Early LPP
15	252.2967	0.020979	positive	F3 Fz F4 FC5 FC1 FC2 FC6 T7 C3 Cz C4 T8 CP5 CP1 CP2 CP6 P3 Pz P4	Early LPP
16	317.3624	0.036963	positive	F3 Fz FC5 FC1 FC2 T7 C3 Cz C4 CP5 CP1 CP2 P3 Pz	P200
16	317.0276	0.036963	positive	F3 Fz FC5 FC1 FC2 T7 C3 Cz C4 CP5 CP1 CP2 CP6 P3 Pz P4	Early LPP
17	38849.4359	0.000999	positive	F3 Fz F4 FC5 FC1 FC2 FC6 T7 C3 Cz C4 T8 CP5 CP1 CP2 CP6 P3 Pz P4	Early LPP
18	538.3446	0.032967	positive	F3 Fz F4 FC5 FC1 FC2 FC6 T7 C3 Cz C4 T8 CP5 CP1 CP2 CP6 P3 Pz P4	Early LPP
19	773.8336	0.000999	positive	F3 Fz F4 FC5 FC1 FC2 FC6 T7 C3 Cz C4 T8 CP5 CP1 CP2 CP6 P3 Pz P4	P200
20	767.5161	0.000999	positive	F3 Fz F4 FC5 FC1 FC2 FC6 T7 C3 Cz C4 T8 CP5 CP1 CP2 CP6 P3 Pz P4	P200
20	324.6641	0.007992	positive	F3 Fz F4 FC5 FC1 FC2 FC6 T7 C3 Cz C4 T8 CP5 CP1 CP2 CP6 P3 Pz P4	Early LPP
22	1497.9255	0.000999	positive	F3 Fz F4 FC5 FC1 FC2 FC6 T7 C3 Cz C4 T8 CP5 CP1 CP2 CP6 P3 Pz P4	Early LPP
22	209.35697	0.003996	positive	Fz FC1 FC2 C3 Cz C4 CP1 CP2 CP6 Pz P4	Early LPP
22	183.63726	0.005994	positive	FC5 T7 C3 Cz CP5 CP1 CP2 Pz	Early LPP
22	107.16032	0.031968	positive	FC5 T7 C3 Cz CP5 CP1 CP2 Pz	Early LPP
22	820.84874	0.000999	positive	F3 Fz F4 FC5 FC1 FC2 FC6 T7 C3 Cz C4 T8 CP5 CP1 CP2 CP6 P3 Pz P4	Late LPP
22	393.92705	0.000999	positive	F3 Fz F4 FC5 FC1 FC2 FC6 C3 C4 T8 CP1 CP2 CP6 Pz P4	Late LPP
24	974.32141	0.02997	positive	F3 Fz F4 FC5 FC1 FC2 FC6 T7 C3 Cz C4 T8 CP5 CP1 CP2 CP6 P3 Pz P4	P200
24	5050.7376	0.001998	positive	F3 Fz F4 FC5 FC1 FC2 FC6 T7 C3 Cz C4 T8 CP5 CP1 CP2 CP6 P3 Pz P4	Early LPP
24	4728.808	0.001998	positive	F3 Fz F4 FC5 FC1 FC2 FC6 T7 C3 Cz C4 T8 CP5 CP1 CP2 CP6 P3 Pz P4	Early LPP
24	1127.548	0.020979	positive	F3 Fz F4 FC5 FC1 FC2 FC6 T7 C3 Cz C4 T8 CP5 CP1 CP2 CP6 P3 Pz P4	Early LPP
24	996.23233	0.026973	positive	F3 Fz F4 FC5 FC1 FC2 FC6 T7 C3 Cz C4 T8 CP5 CP1 CP2 CP6 P3 Pz P4	Late LPP
26	1251.2075	0.001998	positive	F3 Fz FC5 FC1 FC2 FC6 T7 Cz C4 T8 CP5 CP1 CP2 CP6 P3 Pz P4	Early LPP
26	405.47612	0.014985	positive	FC6 C4 T8 CP2 CP6 P4	Early LPP
29	567.9267	0.002997	positive	F3 Fz FC5 FC1 FC2 FC6 T7 C3 Cz C4 T8 CP5 CP1 CP2 CP6 P3 Pz P4	P200
3	569.93143	0.021978	positive	F3 Fz F4 FC5 FC1 FC2 FC6 T7 C3 Cz C4 T8 CP5 CP1 CP2 CP6 P3 Pz P4	P200
3	5307.8621	0.000999	positive	F3 Fz F4 FC5 FC1 FC2 FC6 C3 Cz C4 T8 CP5 CP1 CP2 CP6 P3 Pz P4	Early LPP
3	1968.0904	0.001998	positive	F3 Fz F4 FC5 FC1 FC2 FC6 C3 Cz C4 T8 CP5 CP1 CP2 CP6 P3 Pz P4	Early LPP
3	3594.7651	0.000999	positive	F3 Fz F4 FC5 FC1 FC2 FC6 T7 C3 Cz C4 T8 CP5 CP1 CP2 CP6 P3 Pz P4	Late LPP
3	1419.1687	0.004995	positive	F3 Fz F4 FC5 FC1 FC2 FC6 T7 C3 Cz C4 T8 CP5 CP1 CP2 CP6 P3 Pz P4	Late LPP
30	1557.2114	0.000999	positive	F3 Fz F4 FC5 FC1 FC2 FC6 T7 C3 Cz C4 T8 CP5 CP1 CP2 CP6 P3 Pz P4	P200
30	674.00586	0.001998	positive	F3 Fz F4 FC5 FC1 FC2 FC6 T7 C3 Cz C4 T8 CP5 CP1 CP2 CP6 P3 Pz P4	Early LPP
30	1062.5725	0.000999	positive	F3 Fz F4 FC5 FC1 FC2 FC6 T7 C3 Cz C4 T8 CP5 CP1 CP2 CP6 P3 Pz P4	Late LPP
30	893.44588	0.001998	positive	F3 Fz F4 FC5 FC1 FC2 FC6 T7 C3 Cz C4 CP5 CP1 CP2 CP6 Pz P4	Late LPP
31	542.78593	0.038961	positive	F3 FC5 FC1 FC2 FC6 T7 C3 Cz C4 T8 CP5 CP1 CP2 CP6 P3 Pz P4	Early LPP
31	532.09084	0.040959	positive	F3 Fz FC5 FC1 FC2 FC6 T7 C3 Cz C4 T8 CP5 CP1 CP2 CP6 P3 Pz P4	Early LPP
31	3728.4613	0.000999	positive	F3 Fz F4 FC5 FC1 FC2 FC6 T7 C3 Cz C4 T8 CP5 CP1 CP2 CP6 P3 Pz P4	Late LPP
31	665.20256	0.026973	positive	F3 Fz FC5 FC1 FC2 FC6 T7 C3 Cz C4 T8 CP5 CP1 CP2 CP6 P3 Pz P4	Late LPP
33	169.8833	0.017982	positive	F4 FC2 FC6 Cz C4 T8 CP2 CP6 P4	Late LPP
36	634.2324	0.000999	positive	F3 Fz FC5 FC1 FC2 FC6 C3 Cz C4 T8 CP1 CP2 CP6 P4	P200
36	100.0613	0.033966	positive	Fz FC1 FC2 Cz	P200
36	382.5468	0.000999	positive	FC6 Cz C4 T8 CP1 CP2 CP6 Pz P4	Early LPP
36	343.467	0.000999	positive	F3 FC5 FC1 FC6 T7 C3 C4 T8 CP5 CP1 CP2 CP6 P3 Pz P4	Early LPP
36	120.7982	0.016983	positive	F3 FC5 FC1 C3 Cz CP5 CP1 CP2 P3 Pz	Early LPP
36	487.7943	0.000999	positive	Fz F4 FC1 FC2 FC6 Cz C4 T8 CP1 CP2 CP6 Pz P4	Late LPP
36	352.2571	0.000999	positive	FC5 FC1 FC6 T7 C3 Cz C4 T8 CP5 CP1 CP2 CP6 Pz P4	Late LPP
36	95.36482	0.034965	positive	F3 Fz FC5 FC1 FC2 T7 C3 Cz CP5 CP1 CP2 P3 Pz	Late LPP
5	605.07649	0.007992	positive	F4 FC2 FC6 C4 T8 CP2 CP6 P4	P200
9	394.2007	0.025974	positive	FC5 FC2 FC6 T7 C3 Cz C4 T8 CP5 CP1 CP2 CP6 P3 Pz P4	Early LPP
9	371.0152	0.026973	positive	FC6 C3 Cz C4 T8 CP5 CP1 CP2 CP6 P3 Pz P4	Early LPP

## Sheet: Anger
Participant	sum(F)	p-value	Cluster sign	Cluster topography	ERP
11	2330.0245	0.004995	positive	FC5 FC6 T7 C3 Cz C4 T8 CP5 CP1 CP2 CP6 P3 Pz P4	P200
11	5545.1746	0.001998	positive	Fz F4 FC5 FC1 FC2 FC6 T7 C3 Cz C4 T8 CP5 CP1 CP2 CP6 P3 Pz P4	Early LPP
11	1078.6117	0.008991	positive	FC5 FC6 T7 C3 Cz C4 T8 CP5 CP1 CP2 CP6 P3 Pz P4	Early LPP
11	643.57608	0.015984	positive	FC5 FC6 T7 C3 Cz C4 T8 CP5 CP1 CP2 CP6 P3 Pz P4	Late LPP
11	331.872	0.035964	positive	FC5 T7 C3 Cz CP5 CP1 CP2 P3 Pz	Late LPP
13	3118.1753	0.00999	positive	F3 Fz F4 FC5 FC1 FC2 FC6 T7 C3 Cz C4 T8 CP5 CP1 CP2 CP6 P3 Pz P4	Early LPP
13	2391.384	0.011988	positive	F3 Fz F4 FC5 FC1 FC2 FC6 T7 C3 Cz C4 T8 CP5 CP1 CP2 CP6 P3 Pz P4	Early LPP
14	863.519169	0.003996	positive	F3 FC5 FC1 FC2 FC6 T7 C3 Cz C4 T8 CP5 CP1 CP2 CP6 P3 Pz P4	Early LPP
14	712.190952	0.006993	positive	F3 FC5 FC1 FC6 T7 C3 Cz C4 T8 CP5 CP1 CP2 CP6 P3 Pz	Early LPP
15	591.4852	0.014985	positive	F3 FC5 FC1 T7 C3 CP5 CP1 P3	Early LPP
15	413.2632	0.030969	positive	F3 FC5 FC1 T7 C3 CP5 CP1 P3	Late LPP
20	1296.4004	0.000999	positive	Fz F4 FC1 FC2 FC6 C3 Cz C4 T8 CP1 CP2 CP6 Pz P4	P200
20	323.13205	0.005994	positive	FC2 Cz C4 CP1 CP2 CP6 Pz P4	Early LPP
20	214.284	0.02997	positive	F4 FC2 FC6 C4 T8 CP6	Early LPP
20	195.06631	0.036963	positive	F4 FC2 FC6 C4 T8 CP6	Early LPP
20	185.53529	0.040959	positive	FC2 Cz C4 CP1 CP2 CP6 Pz P4	Early LPP
20	177.04746	0.046953	positive	F4 FC2 FC6 C4	Early LPP
20	240.52562	0.016983	positive	Fz F4 FC1 FC2 FC6 Cz C4 CP2	Late LPP
21	645.87383	0.041958	positive	Fz F4 FC1 FC2 FC6 C3 Cz C4 T8 CP5 CP1 CP2 CP6 P3 Pz P4	P200
21	2513.7077	0.001998	positive	Fz F4 FC5 FC1 FC2 FC6 T7 C3 Cz C4 T8 CP5 CP1 CP2 CP6 P3 Pz P4	Late LPP
21	1465.6121	0.002997	positive	F3 Fz F4 FC5 FC1 FC2 FC6 T7 C3 Cz C4 T8 CP5 CP1 CP2 CP6 P3 Pz P4	Late LPP
21	813.20472	0.020979	positive	F3 Fz F4 FC5 FC1 FC2 FC6 T7 C3 Cz C4 T8 CP5 CP1 CP2 CP6 P3 Pz P4	Late LPP
23	2781.6113	0.002997	positive	F3 Fz F4 FC5 FC1 FC2 FC6 T7 Cz C4 T8 CP5 CP1 CP2 CP6 P3 Pz P4	Early LPP
30	2600.0291	0.000999	positive	F3 Fz F4 FC5 FC1 FC2 FC6 T7 C3 Cz C4 T8 CP5 CP1 CP2 CP6 P3 Pz P4	P200
31	330.13175	0.048951	positive	FC6 C3 Cz C4 T8 CP5 CP1 CP2 CP6 P3 Pz P4	P200
31	1190.3911	0.000999	positive	F3 FC5 FC1 FC6 T7 C3 Cz C4 T8 CP5 CP1 CP2 CP6 P3 Pz P4	Early LPP
31	394.74807	0.033966	positive	Fz FC1 FC2 FC6 C3 Cz C4 T8 CP5 CP1 CP2 CP6 P3 Pz P4	Early LPP
31	2043.0336	0.000999	positive	F4 FC2 FC6 C3 Cz C4 T8 CP5 CP1 CP2 CP6 P3 P4	Late LPP
31	375.55788	0.038961	positive	FC6 C3 Cz C4 T8 CP5 CP1 CP2 CP6 P3 P4	Late LPP
31	350.03867	0.046953	positive	FC6 C3 Cz C4 T8 CP5 CP1 CP2 CP6 P3 P4	Late LPP
32	561.0196	0.011988	positive	FC2 Cz C4 CP1 CP2 CP6 Pz P4	Early LPP
32	450.9357	0.021978	positive	FC2 Cz C4 CP2	Late LPP
32	317.1241	0.045954	positive	FC2 Cz C4 CP2	Late LPP
33	604.7734	0.007992	positive	F3 Fz F4 FC5 FC1 FC2 FC6 C3 Cz C4 T8 CP1 CP2 CP6 Pz P4	Early LPP
33	458.1585	0.021978	positive	Fz F4 FC1 FC2 FC6 C3 Cz C4 CP1 CP2 Pz	Late LPP
36	219.5487	0.02997	positive	Fz FC1 FC2 Cz	P200
5	2880.5087	0.000999	positive	F3 Fz F4 FC5 FC1 FC2 FC6 T7 C3 Cz C4 T8 CP5 CP1 CP2 CP6 Pz	P200
5	4414.3638	0.000999	positive	F3 Fz F4 FC5 FC1 FC2 FC6 C3 Cz C4 T8 CP1 CP6	Early LPP
5	3103.3783	0.000999	positive	F3 Fz F4 FC5 FC1 FC2 FC6 T7 C3 Cz C4 T8 CP5 CP2 CP6 P4	Early LPP
5	760.86889	0.002997	positive	Fz F4 FC1 FC2 FC6 Cz C4 T8 CP2 CP6 P4	Early LPP
5	3103.3783	0.000999	positive	F3 Fz F4 FC5 FC1 FC2 FC6 T7 C3 Cz C4 T8 CP5 CP2 CP6 P4	Late LPP
5	1435.0258	0.000999	positive	Fz F4 FC1 FC2 FC6 Cz C4 T8 CP2 CP6 P4	Late LPP
5	248.55207	0.032967	positive	C4 CP2 CP6 P4	Late LPP

## Sheet: Disgust
Participant	sum(F)	p-value	Cluster sign	Cluster topography	ERP
11	520.7948	0.032967	positive	F3 Fz F4 FC5 FC1 FC2 FC6 C3 Cz C4 T8 CP2 CP6	P200
14	740.9064	0.000999	positive	F3 Fz FC5 FC1 FC2 C3 Cz CP1 CP2 Pz	P200
14	439.8356	0.000999	positive	Fz FC1 FC2 C3 Cz C4 CP5 CP1 CP2 P3	Early LPP
14	176.627	0.011988	positive	F3 FC5 FC1 C3 Cz CP5 CP1 CP2 P3 Pz	Early LPP
14	92.11734	0.045954	positive	F3 FC5 FC1 C3 Cz CP1 CP2 Pz	Early LPP
14	393.6611	0.000999	positive	F3 FC5 FC1 T7 C3 Cz CP5 CP1 CP2 P3 Pz	Late LPP
14	387.7841	0.000999	positive	F3 FC5 FC1 T7 C3 Cz CP5 CP1 CP2 P3 Pz	Late LPP
14	138.8138	0.016983	positive	F3 Fz FC5 FC1 FC2 T7 C3 Cz CP5	Late LPP
15	273.403	0.033966	positive	Fz FC1 FC2 Cz C4 CP2 CP6 P4	Early LPP
16	976.0215	0.036963	positive	F3 Fz F4 FC5 FC1 FC2 FC6 T7 C3 Cz C4 T8 CP5 CP1 CP2 CP6 P3 Pz P4	P200
17	4651.0924	0.024975	positive	F3 Fz F4 FC5 FC1 FC2 FC6 T7 C3 Cz C4 T8 CP5 CP1 CP2 CP6 P3 Pz P4	P200
17	8054.7097	0.013986	positive	F3 Fz F4 FC5 FC1 FC2 FC6 T7 C3 Cz C4 T8 CP5 CP1 CP2 CP6 P3 Pz P4	Early LPP
21	392.066	0.035964	positive	F3 Fz FC5 FC1 FC2 C3 Cz C4 CP1 CP2 CP6 Pz P4	Late LPP
22	2739.3332	0.003996	positive	F3 Fz F4 FC5 FC1 FC2 FC6 T7 C3 Cz C4 T8 CP5 CP1 CP2 CP6 P3 Pz P4	Early LPP
22	1178.561	0.010989	positive	F4 FC5 FC2 FC6 T7 C3 Cz C4 T8 CP5 CP1 CP2 CP6 P3 Pz P4	Early LPP
22	5837.8687	0.000999	positive	F3 Fz F4 FC5 FC1 FC2 FC6 T7 C3 Cz C4 T8 CP5 CP1 CP2 CP6 P3 Pz P4	Late LPP
22	2739.3332	0.003996	positive	F3 Fz F4 FC5 FC1 FC2 FC6 T7 C3 Cz C4 T8 CP5 CP1 CP2 CP6 P3 Pz P4	Late LPP
29	22744.6074	0.000999	positive	F3 Fz F4 FC5 FC1 FC2 FC6 T7 C3 Cz C4 T8 CP5 CP1 CP2 CP6 P3 Pz P4	Early LPP
3	2049.4849	0.022977	positive	F3 Fz F4 FC5 FC1 FC2 FC6 C3 Cz C4 T8 CP5 CP1 CP2 CP6 P3 Pz P4	Early LPP
3	1643.9449	0.030969	positive	Fz F4 FC5 FC1 FC2 FC6 T7 C3 Cz C4 T8 CP5 CP1 CP2 CP6 P3 Pz P4	Early LPP
3	1200.6501	0.044955	positive	F3 Fz F4 FC5 FC1 FC2 FC6 C3 Cz C4 T8 CP5 CP1 CP2 CP6 P3 Pz P4	Late LPP
30	454.1802	0.024975	positive	F3 Fz F4 FC5 FC1 FC2 FC6 T7 C3 Cz T8 CP5 CP1 CP2 CP6 P3 Pz P4	P200
31	3406.9329	0.016983	positive	F3 Fz F4 FC5 FC1 FC2 FC6 T7 C3 Cz C4 T8 CP5 CP1 CP2 CP6 P3 Pz P4	Late LPP
33	2652.2073	0.000999	positive	F4 FC5 FC2 FC6 T7 C3 Cz C4 CP5 CP1 CP2 CP6 P3 Pz P4	Late LPP
33	641.8662	0.000999	positive	F4 FC2 FC6 C3 C4 CP5 CP1 CP2 P3 Pz	Late LPP
36	716.1294	0.001998	positive	F3 Fz FC5 FC1 FC2 T7 Cz C4 CP5 CP1 CP2 CP6 P3 Pz P4	Early LPP
7	10980.2667	0.001998	positive	F3 Fz F4 FC5 FC1 FC2 FC6 T7 C3 Cz C4 T8 CP5 CP1 CP2 CP6 P3 Pz P4	Late LPP

## Sheet: Fear
Participant	sum(F)	p-value	Cluster sign	Cluster topography	ERP
10	1339.2968	0.013986	positive	Fz FC1 FC2 FC6 Cz C4 T8 CP1 CP2 CP6 Pz P4	Late LPP
11	898.5658	0.000999	positive	Fz F4 FC1 FC2 FC6 Cz C4 T8 CP2 CP6 P4	P200
11	934.8484	0.000999	positive	F3 Fz F4 FC5 FC1 FC2 FC6 T7 C3 Cz C4 T8 CP5 CP1 CP2 CP6 P3 Pz P4	Early LPP
11	303.8699	0.024975	positive	F4 FC2 FC6 C4 T8 CP2 CP6 P4	Early LPP
11	306.0912	0.024975	positive	Fz F4 FC1 FC2 FC6 Cz T8 CP2 CP6 P4	Late LPP
14	1041.2872	0.003996	positive	F3 Fz F4 FC5 FC1 FC2 FC6 T7 C3 Cz C4 T8 CP5 CP1 CP2 CP6 P3 Pz P4	Early LPP
15	1852.4792	0.001998	positive	F3 Fz FC5 FC1 FC2 FC6 T7 C3 Cz C4 T8 CP5 CP1 CP2 CP6 Pz P4	P200
15	5361.025	0.000999	positive	F3 Fz F4 FC5 FC1 FC2 FC6 T7 C3 Cz C4 T8 CP5 CP1 CP2 CP6 P3 Pz P4	Early LPP
15	2776.925	0.001998	positive	F3 Fz FC5 FC1 FC2 FC6 T7 C3 Cz C4 T8 CP5 CP1 CP2 CP6 Pz P4	Early LPP
15	1019.3988	0.024975	positive	F3 Fz FC5 FC1 FC2 FC6 T7 C3 Cz C4 T8 CP5 CP1 CP2 CP6 Pz P4	Early LPP
15	958.61546	0.033966	positive	F3 Fz FC5 FC1 FC2 FC6 T7 C3 Cz C4 T8 CP5 CP1 CP2 CP6 Pz P4	Early LPP
15	859.89039	0.041958	positive	F3 Fz FC5 FC1 FC2 FC6 T7 C3 Cz C4 T8 CP5 CP1 CP2 CP6 Pz P4	Early LPP
15	6941.3017	0.000999	positive	F3 Fz FC5 FC1 FC2 FC6 T7 C3 Cz C4 T8 CP5 CP1 CP2 CP6 P3 Pz P4	Late LPP
15	5361.025	0.000999	positive	F3 Fz F4 FC5 FC1 FC2 FC6 T7 C3 Cz C4 T8 CP5 CP1 CP2 CP6 P3 Pz P4	Late LPP
17	37601.9109	0.001998	positive	F3 Fz F4 FC5 FC1 FC2 FC6 T7 C3 Cz C4 T8 CP5 CP1 CP2 CP6 P3 Pz P4	Early LPP
18	3199.7135	0.03996	positive	F3 Fz F4 FC5 FC1 FC2 FC6 T7 C3 Cz C4 T8 CP5 CP1 CP2 CP6 P3 Pz P4	Late LPP
20	406.7683	0.010989	positive	Fz FC1 FC2 C3 Cz CP5 CP1 CP2 P3 Pz	P200
24	5199.9116	0.000999	positive	F3 Fz F4 FC5 FC1 FC2 FC6 T7 C3 Cz C4 T8 CP5 CP1 CP2 CP6 P3 Pz P4	Early LPP
24	3893.4317	0.002997	positive	F3 Fz F4 FC5 FC1 FC2 FC6 T7 C3 Cz C4 T8 CP5 CP1 CP2 CP6 P3 Pz P4	Early LPP
31	664.7093	0.027972	positive	Fz F4 FC5 FC1 FC2 FC6 T7 C3 Cz C4 T8 CP5 CP1 CP2 CP6 Pz P4	P200
34	347.864	0.031968	positive	F3 Fz F4 FC5 FC1 FC2 FC6 C3 Cz C4 CP1 CP2 Pz	P200
36	1678.7341	0.000999	positive	F3 Fz F4 FC5 FC1 FC2 FC6 T7 C3 Cz C4 T8 CP5 CP1 CP2 CP6 P3 Pz P4	Early LPP
36	1661.8253	0.000999	positive	F3 Fz F4 FC5 FC1 FC2 FC6 T7 Cz C4 CP5 CP1 CP2 CP6 P3 Pz P4	Early LPP
36	1876.6933	0.000999	positive	F3 Fz F4 FC5 FC1 FC2 FC6 T7 C3 Cz C4 T8 CP5 CP1 CP2 CP6 P3 Pz P4	Late LPP
36	1661.8253	0.000999	positive	F3 Fz F4 FC5 FC1 FC2 FC6 T7 Cz C4 CP5 CP1 CP2 CP6 P3 Pz P4	Late LPP
36	1503.7285	0.000999	positive	F3 Fz F4 FC5 FC1 FC2 FC6 T7 C3 Cz C4 CP5 CP1 CP2 CP6 P3 Pz P4	Late LPP
36	344.73495	0.016983	positive	Fz F4 FC1 FC2 FC6 Cz C4 CP1 CP2 CP6 Pz P4	Late LPP
36	285.62884	0.031968	positive	Fz F4 FC1 FC2 FC6 Cz C4 CP1 CP2 CP6 Pz P4	Late LPP
5	3211.9859	0.000999	positive	F3 Fz F4 FC5 FC1 FC2 FC6 T7 C3 Cz C4 T8 CP5 CP1 CP2 CP6 P3 Pz P4	P200

## Sheet: Happiness
Participant	sum(F)	p-value	Cluster sign	Cluster topography	ERP
13	4468.5166	0.025974	positive	F3 Fz F4 FC5 FC1 FC2 FC6 T7 C3 Cz C4 T8 CP5 CP1 CP2 CP6 P3 Pz P4	P200
14	3016.313	0.000999	positive	Fz FC5 FC1 FC2 FC6 T7 C3 Cz C4 T8 CP5 CP1 CP2 CP6 P3 P4	P200
14	1500.9723	0.001998	positive	Fz FC5 FC1 FC2 FC6 T7 C3 Cz C4 T8 CP5 CP1 CP2 CP6 P3 P4	Early LPP
14	658.18793	0.011988	positive	Fz FC5 FC1 FC2 T7 C3 Cz CP5 CP1 P3	Early LPP
16	272.3346	0.03996	positive	FC6 C4 T8 CP2 CP6 P4	Early LPP
18	1560.9011	0.042957	positive	F3 Fz F4 FC5 FC1 FC2 FC6 T7 C3 Cz C4 T8 CP5 CP1 CP2 CP6 P3 Pz	Early LPP
19	335.2604	0.002997	positive	F3 Fz FC5 FC1 FC2 C3 Cz CP1 CP2 Pz	P200
22	9868.1855	0.005994	positive	F3 Fz F4 FC5 FC1 FC2 FC6 T7 C3 Cz C4 T8 CP5 CP1 CP2 CP6 Pz P4	Early LPP
22	3669.1211	0.015984	positive	F3 Fz F4 FC5 FC1 FC2 FC6 T7 C3 Cz C4 T8 CP5 CP1 CP2 CP6 P3 Pz P4	Late LPP
22	1584.8324	0.046953	positive	F3 Fz F4 FC5 FC1 FC2 FC6 T7 C3 Cz C4 T8 CP5 CP1 CP2 CP6 Pz P4	Late LPP
3	656.71976	0.003996	positive	Fz FC1 FC2 Cz C4 CP2	P200
3	2806.4093	0.000999	positive	F3 Fz F4 FC5 FC1 FC2 FC6 T7 C3 Cz C4 CP5 CP2 CP6 P4	Early LPP
3	2146.5178	0.000999	positive	F3 Fz F4 FC5 FC1 FC2 FC6 T7 C3 Cz C4 CP5 CP2 CP6 P4	Early LPP
3	2445.2102	0.000999	positive	F3 Fz F4 FC5 FC1 FC2 FC6 T7 C3 Cz C4 CP5 CP1 CP2 P3	Late LPP
3	552.30229	0.006993	positive	F3 Fz F4 FC5 FC1 FC2 FC6 T7 C3 Cz C4 CP5 CP2	Late LPP
31	591.4879	0.018981	positive	F3 Fz FC5 FC1 FC2 T7 C3 Cz C4 CP5 CP1 CP2 CP6 P4	P200
31	766.9563	0.005994	positive	F4 FC5 FC1 FC2 FC6 T7 C3 Cz C4 T8 CP5 CP1 CP2 CP6 P3 Pz P4	Early LPP
34	255.7989	0.043956	positive	C3 CP5 CP1 P3	P200
37	1714.7311	0.023976	positive	F3 Fz F4 FC5 FC1 FC2 FC6 T7 C3 Cz C4 T8 CP5 CP1 CP2 CP6 P3 Pz P4	P200

## Sheet: Neutral
Participant	sum(F)	p-value	Cluster sign	Cluster topography	ERP
11	1079.9193	0.003996	positive	Fz F4 FC5 FC1 FC2 FC6 T7 C3 C4 CP5 CP1 P3	P200
14	1304.6925	0.003996	positive	F3 Fz F4 FC5 FC1 FC2 FC6 C3 Cz C4 T8 CP1 CP2 CP6 Pz P4	P200
14	1399.7204	0.003996	positive	F3 Fz F4 FC5 FC1 FC2 FC6 C3 C4 T8 CP2 CP6 P4	Early LPP
14	1397.221	0.003996	positive	F3 Fz F4 FC5 FC1 FC2 FC6 C3 Cz C4 T8 CP2 CP6 P4	Early LPP
14	667.82614	0.012987	positive	F3 Fz F4 FC5 FC1 FC2 FC6 C3 Cz C4 T8 CP2 CP6 P4	Early LPP
14	357.0818	0.043956	positive	F3 Fz F4 FC5 FC1 FC2 FC6 C3 Cz C4 T8 CP2 CP6 P4	Early LPP
14	1515.7938	0.003996	positive	F3 Fz F4 FC5 FC1 FC2 FC6 C3 C4 T8 CP2 CP6 P4	Late LPP
14	837.14597	0.007992	positive	F3 Fz F4 FC5 FC1 FC2 FC6 T7 C3 C4 T8 CP5 CP1 CP2 CP6 Pz P4	Late LPP
14	474.307	0.027972	positive	F3 Fz F4 FC5 FC1 FC2 FC6 C3 C4 T8 CP2 CP6 P4	Late LPP
14	403.94652	0.035964	positive	F3 Fz F4 FC5 FC1 FC2 FC6 C3 Cz C4 T8 CP2 CP6 P4	Late LPP
18	66902.472	0.000999	positive	F3 Fz F4 FC5 FC1 FC2 FC6 T7 C3 Cz C4 T8 CP5 CP1 CP2 CP6 P3 Pz P4	Early LPP
19	254.8583	0.034965	positive	FC2 Cz C4 CP1 CP2 CP6 Pz P4	P200
2	2942.5886	0.000999	positive	F3 F4 FC5 FC1 FC2 FC6 T7 C3 C4 CP5 CP1 CP2 CP6 P3 Pz P4	Late LPP
20	1578.9064	0.000999	positive	F3 Fz F4 FC5 FC1 FC2 FC6 T7 C3 Cz C4 T8 CP5 CP1 CP2 CP6 P3 Pz P4	P200
20	485.39468	0.003996	positive	F3 Fz F4 FC5 FC1 FC2 FC6 T7 C3 Cz C4 T8 CP5 CP1 CP2 CP6 P3 P4	Late LPP
22	661.1798	0.01998	positive	F3 Fz F4 FC5 FC1 FC2 FC6 C3 Cz C4 T8 CP1 CP2 CP6 Pz P4	P200
24	543.9682	0.012987	positive	F4 FC2 FC6 Cz C4 T8 CP2 CP6 P4	P200
24	393.7426	0.032967	positive	F4 FC2 FC6 Cz C4 T8 CP2 CP6 P4	P200
24	353.7969	0.03996	positive	FC2 FC6 Cz C4 T8 CP2 CP6 P4	Early LPP
3	2003.4258	0.000999	positive	F3 Fz F4 FC5 FC1 FC2 FC6 C3 Cz C4 T8 CP1 CP2 CP6 Pz P4	Late LPP
3	1341.3964	0.000999	positive	F3 Fz F4 FC5 FC1 FC2 FC6 C3 Cz C4 T8 CP1 CP6	Late LPP
3	1220.4104	0.000999	positive	F3 Fz F4 FC5 FC1 FC2 FC6 C3 Cz C4 T8 CP1 CP6	Late LPP
30	692.3812	0.012987	positive	F3 Fz FC5 FC1 FC2 T7 C3 Cz C4 CP5 CP1 CP2 CP6 P3 P4	Early LPP
33	1029.2111	0.012987	positive	F3 Fz F4 FC5 FC1 FC2 FC6 T7 C3 Cz C4 CP5 CP1 CP2 CP6 P3 Pz P4	Early LPP
33	906.95211	0.016983	positive	FC1 FC2 C3 Cz C4 CP5 CP1 CP2 P3 Pz	Early LPP
36	390.9859	0.017982	positive	F3 Fz F4 FC5 FC1 FC2 FC6 T7 C4 T8 CP5 CP1 CP2 CP6 P3 Pz P4	P200
36	332.8834	0.031968	positive	Fz F4 FC1 FC2 FC6 C3 Cz C4 CP1	P200
36	314.092	0.037962	positive	F3 Fz FC5 FC1 FC2 C3 Cz C4 CP5 CP1 CP2 CP6 P3 Pz P4	Late LPP
6	8294.0595	0.002997	positive	F3 Fz F4 FC5 FC1 FC2 FC6 T7 C3 Cz C4 T8 CP5 CP1 CP2 CP6 P3 Pz P4	P200
6	8294.0595	0.002997	positive	F3 Fz F4 FC5 FC1 FC2 FC6 T7 C3 Cz C4 T8 CP5 CP1 CP2 CP6 P3 Pz P4	Early LPP
7	7668.11553	0.006993	positive	Fz F4 FC1 FC2 FC6 C3 Cz C4 T8 CP5 CP1 CP2 CP6 P3 Pz P4	P200
7	11165.8476	0.002997	positive	Fz F4 FC1 FC2 FC6 C3 Cz C4 T8 CP5 CP1 CP2 CP6 P3 Pz P4	Early LPP
7	11165.8476	0.002997	positive	Fz F4 FC1 FC2 FC6 C3 Cz C4 T8 CP5 CP1 CP2 CP6 P3 Pz P4	Late LPP

## Sheet: Sadness
Participant	sum(F)	p-value	Cluster sign	Cluster topography	ERP
1	1559.573	0.040959	positive	F3 Fz F4 FC5 FC1 FC2 FC6 T7 C3 Cz C4 T8 CP5 CP1 CP2 CP6 P3 Pz P4	P200
11	743.3255	0.000999	positive	F3 Fz FC5 FC1 FC2 C3 Cz C4 CP1 CP2 Pz	P200
11	620.3608	0.000999	positive	Fz FC1 FC2 C3 Cz CP5 CP1 P3	Late LPP
11	557.0604	0.000999	positive	FC5 FC1 FC6 T7 C3 Cz C4 T8 CP5 CP1 CP2 CP6 P3 P4	Late LPP
14	852.0838	0.002997	positive	F4 FC2 FC6 C4 CP2 CP6 P4	P200
14	295.4579	0.028971	positive	F3 FC5 FC1 T7 C3 Cz CP5 CP1 CP2 P3 Pz	Late LPP
14	270.0454	0.037962	positive	FC1 C3 Cz CP5 CP1 P3	Late LPP
17	2416.0818	0.028971	positive	F3 Fz F4 FC5 FC1 FC2 FC6 T7 C3 Cz C4 T8 CP5 CP1 CP2 CP6 P3 Pz P4	Late LPP
19	292.159	0.042957	positive	F3 Fz F4 FC5 FC1 FC2 FC6 T7 C3 Cz C4 CP5 CP1 P3	P200
23	635.9609	0.006993	positive	F3 Fz F4 FC5 FC1 FC2 FC6 T7 C3 Cz C4 CP5 CP1 CP2 P3 Pz	Late LPP
23	427.5449	0.014985	positive	F3 FC5 FC1 T7 C3 Cz CP5 CP1 CP2 P3 Pz	Late LPP
23	332.7893	0.02997	positive	F3 FC5 FC1 T7 C3 Cz CP5 CP1 CP2 P3 Pz	Late LPP
24	1642.6034	0.000999	positive	F3 Fz F4 FC5 FC1 FC2 FC6 T7 Cz C4 CP5 CP1 CP2 P3 Pz	P200
24	476.47682	0.002997	positive	F3 Fz F4 FC5 FC1 FC2 FC6 T7 C3 Cz C4 T8 CP5 CP1 CP6 P3	Early LPP
24	345.16193	0.012987	positive	F3 Fz F4 FC5 FC1 FC2 FC6 C3 Cz C4 CP1	Early LPP
24	443.84166	0.004995	positive	F3 Fz FC5 FC1 FC2 C3 Cz CP1	Late LPP
25	496.6363	0.008991	positive	Fz FC1 FC2 C3 Cz C4 CP5 CP1 CP2 P3	P200
25	361.1821	0.018981	positive	FC6 Cz C4 T8 CP1 CP2 CP6 Pz P4	Early LPP
25	591.1506	0.005994	positive	Fz F4 FC1 FC2 FC6 C3 Cz C4 T8 CP5 CP1 CP2 CP6 P3 P4	Late LPP
3	2151.0645	0.004995	positive	F3 Fz F4 FC5 FC1 FC2 FC6 T7 C3 Cz C4 T8 CP5 CP1 CP2 CP6 P3	P200
3	6042.2214	0.001998	positive	F3 Fz F4 FC5 FC1 FC2 FC6 T7 C3 Cz C4 T8 CP5 CP1 CP2 CP6 P3	Early LPP
3	9649.2761	0.001998	positive	F3 Fz F4 FC5 FC1 FC2 FC6 T7 C3 Cz C4 T8 CP5 CP1 CP2 CP6 P3 Pz P4	Late LPP
30	1670.0723	0.000999	positive	F3 Fz F4 FC5 FC1 FC2 FC6 T7 C3 Cz C4 T8 CP5 CP1 CP2 CP6 P3 P4	P200
30	949.38406	0.000999	positive	F4 FC2 FC6 C3 C4 T8 CP5 CP1 CP2 CP6 P3 Pz P4	P200
30	765.65807	0.001998	positive	F3 FC5 FC1 T7 C3 CP5	Late LPP
31	615.3618	0.010989	positive	Fz FC1 FC2 C3 Cz C4 CP1 CP2 CP6 Pz P4	Late LPP
33	150.905	0.047952	positive	FC1 C3 Cz CP1	Late LPP
8	308.3727	0.003996	positive	FC2 Cz C4 CP1 CP2 Pz	P200
